# Supplementary material for: A soybean sodium/hydrogen exchanger GmNHX6 confers plant alkaline salt tolerance by regulating Na+/K+ homeostasis
Source: Frontiers journal article supplement (doi:10.3389/fpls.2022.938635), 2022-09-20
Supplement: Data_Sheet_1.PDF [file Data_Sheet_1.PDF]

## Supplementary Material

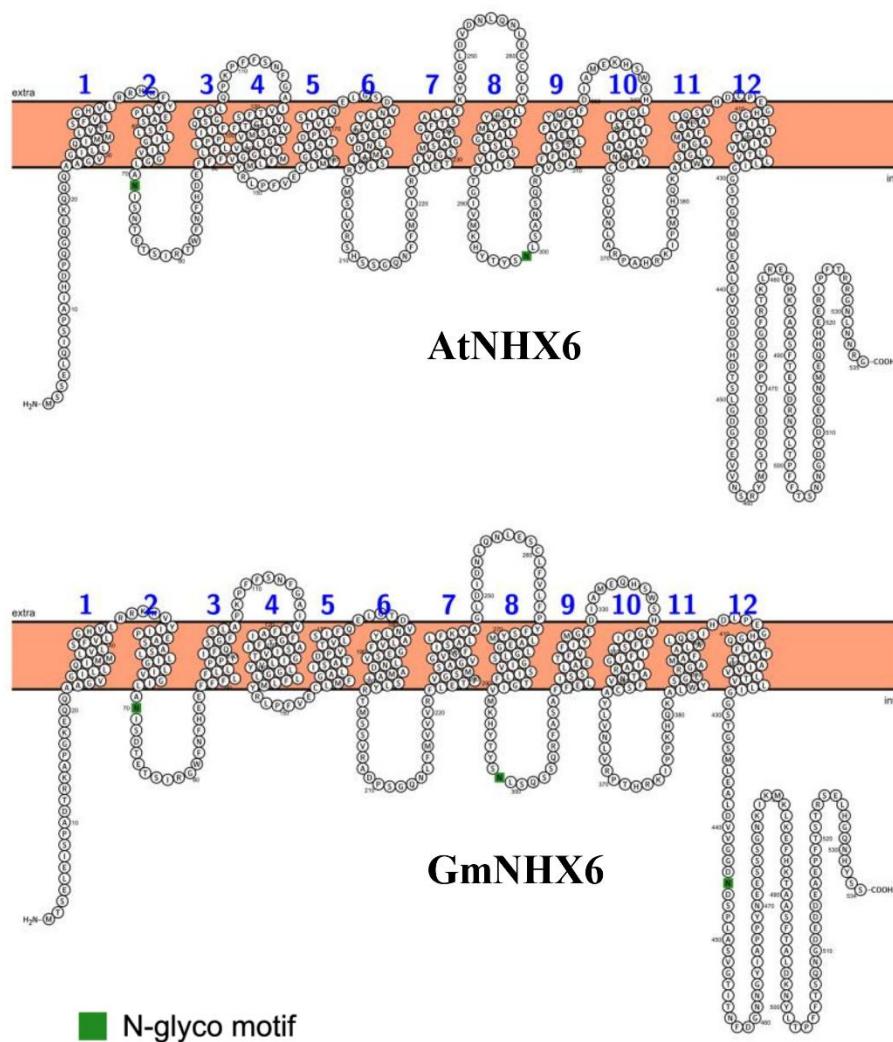

**Supplementary Figure 1. The putative topology of AtNHX6 and GmNHX6 using Protter database.** The topology of GmNHX6 of soybean shows 12 transmembrane domains, similar with that of AtNHX6 of *Arabidopsis*.

|        |                                                                                    |     |
|--------|------------------------------------------------------------------------------------|-----|
| AtNHX6 | ...MSSELQISPAIHDP.....QGQEKQCCAGVGILLQIMMLVLSFVLGHVLRHRFYLLPEASASLLIGLIVG          | 67  |
| GmNHX6 | ...MTSELEISPADTR.....KAPGKEQCCAGVGILLQIMMLVLSFVLGHVLRHRFYLLPEASASLLIGLIVG          | 66  |
| PdNHX6 | MSTVVEEIMQMQISPAAGGGGDSQ....SHPGKEQCCAGVGILLQIMMLVLSFVLGHVLRHRFYLLPEASASLLIGLIVG   | 76  |
| SbNHX6 | ...MALELRLASSEFPAGGGGLACPPFLAPPGEQCVAGVGILLQISMLVLSFVLGHVLRHRFYLLPEASASLLIGLIVG    | 77  |
| ZmNHX6 | ...MALELSLASSEFPAGGGGLACPPFLAPPGEQCVAGVGILLQISMLVLSFVLGHVLRHRFYLLPEASASLLIGLIVG    | 77  |
| AtNHX6 | GLANISNTETSIKRWNFHDEFFFLFLLPPIIFQSGFSLQPKPFFSNFGAIVTFSVLGTFFVASVVTGILVYLGGVMFLMY   | 147 |
| GmNHX6 | ILANISDTETSIKRWNFHDEFFFLFLLPPIIFQSGFSLAPKPFSSNFGAIVTFIFGTFFIASVVTGILVYLGGILFLMY    | 146 |
| PdNHX6 | ALANISNTETSIKAWNFHDEFFFLFLLPPIIFQSGFSLSPKPFSSNFGAIVTFISILGTFFIASVVTGVLVYLGGIILYITY | 156 |
| SbNHX6 | GLANISNTETINIRWNFHDEFFFLFLLPPIIFQSGFSLSPKPFSSNFGAIVTFAILGTFFIASVVTGVLVYLGGITFLMY   | 157 |
| ZmNHX6 | GLANISNTETINIRWNFHDEFFFLFLLPPIIFQSGFSLSPKPFSSNFGAIVTFAILGTFFIASVVTGVLVYLGGITFLMY   | 157 |
| AtNHX6 | RLPFEVECLMFGSLISATDPVTVLSIFQELGSTVNLYALVFGEESVLNDAMASLYRTMSLVRSHSSG.QNFFMVIVRFLET  | 226 |
| GmNHX6 | RLPFEVECLMFGALISATDPVTVLSIFQELGIDVNLYALVFGEESVLNDAMASLYRTMSVVRADSSG.QNFFMVIVRFLET  | 225 |
| PdNHX6 | KLPFEVECLMFGALISATDPVTVLSIFQELGIITNLYALVFGEESVLNDAMASLYRTMSSLKSHAPG.QNFFMVIVRFLET  | 235 |
| SbNHX6 | KLPFEVECLMFGALISATDPVTVLSIFQELGSTVNLYALVFGEESVLNDAMASLYRTMSVRSRAGGQENLFFMILQFLET   | 237 |
| ZmNHX6 | KLPFEVECLMFGALISATDPVTVLSIFQELGSTVNLYALVFGEESVLNDAMASLYRTMSVRSRAGGQENLFFMILQFLET   | 237 |
| AtNHX6 | FVGSMSAGVGVGFTSALLFKYAGLDVDNLQNLCECLFVLFPYFSYMLAEGLSLGSIVSILFTGIVMKHYTYSNLSANSQR   | 306 |
| GmNHX6 | FVGSMSAGVGVGFTSALLFKYAGLDVDNLQNLCECLFVLFPYFSYMLAEGLSLGSIVSILFTGIVMKHYTYSNLSQSSQR   | 305 |
| PdNHX6 | FVGSLSAGVGVGFTSALLFKYAGLDVDNLQNLCECLFVLFPYFSYMLAEGLSLGSIVSILFTGIVMKHYTFSNLSSENSQR  | 315 |
| SbNHX6 | FVGSMSAGVGVGFTSALLFKYAGLDVDNLQNLCECLFVLFPYFSYMLAEGLSLGSIVSILFTGIVMKHYTYSNLSDNSQR   | 317 |
| ZmNHX6 | FVGSMSAGVGVGFTSALLFKYAGLDVDNLQNLCECLFVLFPYFSYMLAEGLSLGSIVSILFTGIVMKHYTYSNLSDNSQR   | 317 |
| AtNHX6 | FVSAFFHLISSLAETFVFIYMGFDIAMEKHSWSHVGFIFFSIIFFIVVARAANVFSCAYLVNLSRPFHRIEPLKHQKALWY  | 386 |
| GmNHX6 | EASAFFELISSLAETFVFIYMGFDIAMEQHSWSHVGFIFFSIIFFIGIARATNVFSCAYLVNLSRPFHRIEPLKHQKALWY  | 385 |
| PdNHX6 | FVSAFFHLISSLAETFVFIYMGFDIAMEQHSWSHVGFIFFSIIFFIVVARAANVFSCAYLVNLSRPFHRIEPLKHQKALWY  | 395 |
| SbNHX6 | FVSAFFHLISSLAETFVFIYMGFDIAMEEHSWSHVGFIFFSIIFFIVVARAANVFSCAYLVNLSRPFHRIEPLKHQKALWF  | 397 |
| ZmNHX6 | FVSAFFHLISSLAETFVFIYMGFDIAMEEHSWSHVGFIFFSIIFFIVVARAANVFSCAYLVNLSRPFHRIEPLKHQKALWF  | 397 |
| AtNHX6 | SGLRGAMAFALALQSVHDLPEGHGCTIFTATTAIIVVLTVLLIGGSTGTMLEADVVGGDSDHDTSGTGFEVVN....SRYM  | 462 |
| GmNHX6 | SGLRGAMAFALALQSVHDLPEGHGCTIFTATTAIIVVLTVLLIGGSTGTSMLEADVVGGDSDHDTSGTGFEVVN....SRYM | 465 |
| PdNHX6 | SGLRGAMAFALALQSVHDLPEGHGCTIFTATTAIIVVLTVLLIGGSTGTVLETLQVVGDDHGHGTSGLIGNN....GYV    | 470 |
| SbNHX6 | SGLRGAMAFALALQSVHDLPEGHGCTIFTATTAIIVVLTVLLIGGSTGTMLEADVVGGDSDHDTSGTGFEVVN....SRYM  | 470 |
| ZmNHX6 | SGLRGAMAFALALQSVHDLPEGHGCTIFTATTAIIVVLTVLLIGGSTGTSMLEADVVGGDSDHDTSGTGFEVVN....SRYM | 470 |
| AtNHX6 | TSYDDLDTPPESGFRTKLRDFHKSPASFTALDRNYLTPFFTSQNGYDDG....NMEQHHEERIPFTRRGNLNRR         | 534 |
| GmNHX6 | APPYNEESSGNKIKMKLKEFHKTAASFTALDRNYLTPFFTSQNGYDDG....AEPFTSTRSELHGQNHYS.            | 534 |
| PdNHX6 | APSYNEDATSGNRLMKLKEFHKSTASFTALDRNYLTPFFTSQNGIDEBEHGCMDDPMSSSGRGFLGN....            | 541 |
| SbNHX6 | PFSYEECTSSGGGLRMKIKQFHKSTSTFTALDRNYLTPFFTSQTDIDDDIF....TGQQEQNRRLAFYDC.....        | 536 |
| ZmNHX6 | PFSYEECTSSGGGLRMKIKQFHKSTSTFTALDRNYLTPFFTSQTDIDDDIF....FSCQEQNRRLAFYDC.....        | 536 |

**Supplementary Figure 2. Multiple sequence alignment of the deduced amino acid sequence of GmNHX6 and four NHX6 sequences from different plant species.** Red boxes are the conserved acidic residues of NHX6. Four other NHX6 sequences include AtNHX6 (NP\_178079.2) from *Arabidopsis thaliana*, PdNHX6 (XP\_008811204.1) from *Phoenix dactylifera*, SbNHX6 (XP\_021308686.1) from *Sorghum bicolor*, ZmNHX6 (ACG45634.1) from *Zea mays*.

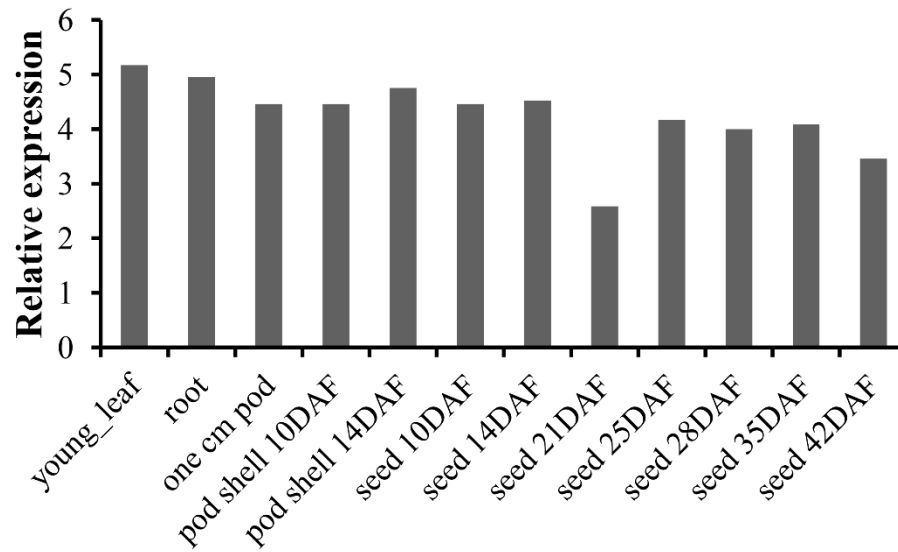

**Supplementary Figure 3. Tissue expression patterns of *GmNHX6* in soybean.** The raw reads from RNA-seq data of *Glycine max* ([www.soybase.org](http://www.soybase.org)) were transformed to  $\log_2(\text{FPKM} + 1)$ .

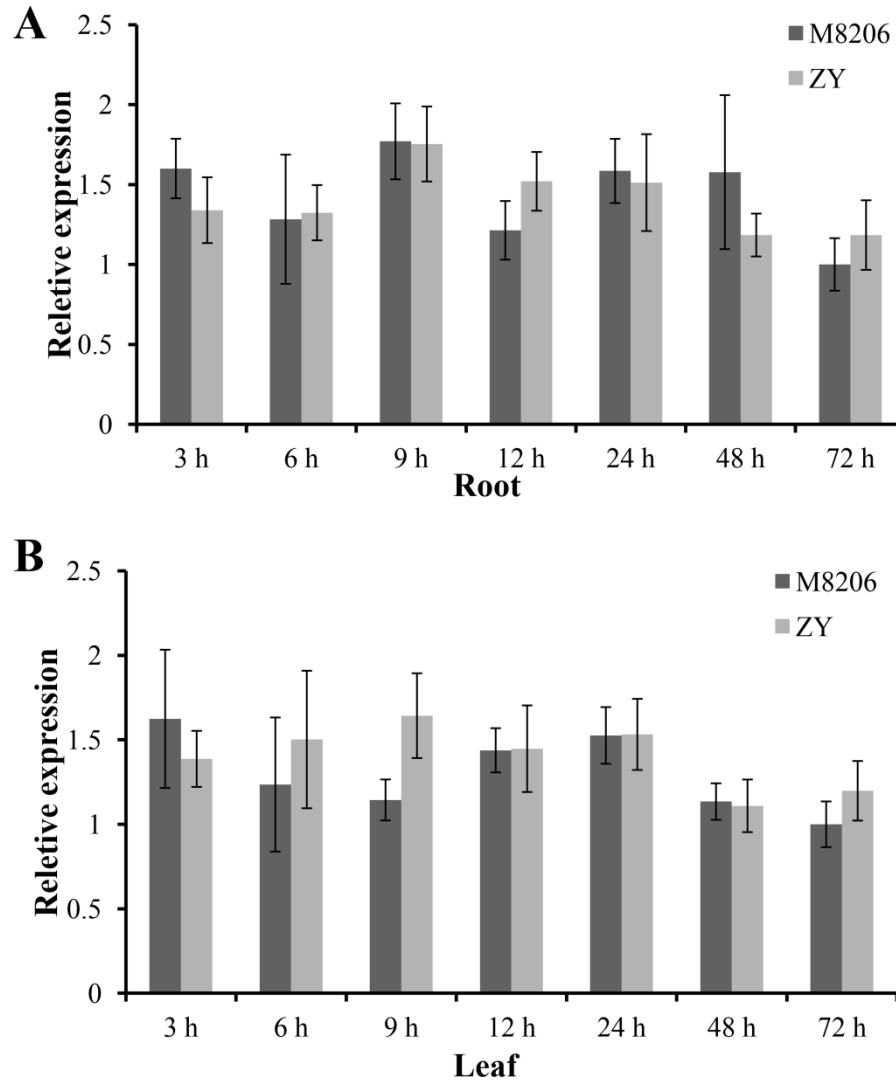

**Supplementary Figure 4.** Relative expression of *GmNHX6* in two soybean varieties under normal condition (0 mM NaHCO<sub>3</sub>). The relative expression of *GmNHX6* in soybean root tips (0 ~ 2 mm) was quantified by qRT-PCR, using *GmUKNI* as the reference gene and M8206 under 0 mM NaHCO<sub>3</sub> at 72 h (with lowest expression level of *GmNHX6*) as the control (relative expression = 1). Data represents the mean ± standard deviation of three replicates. There was no difference between two soybean varieties by the two-tailed Student's *t* tests.

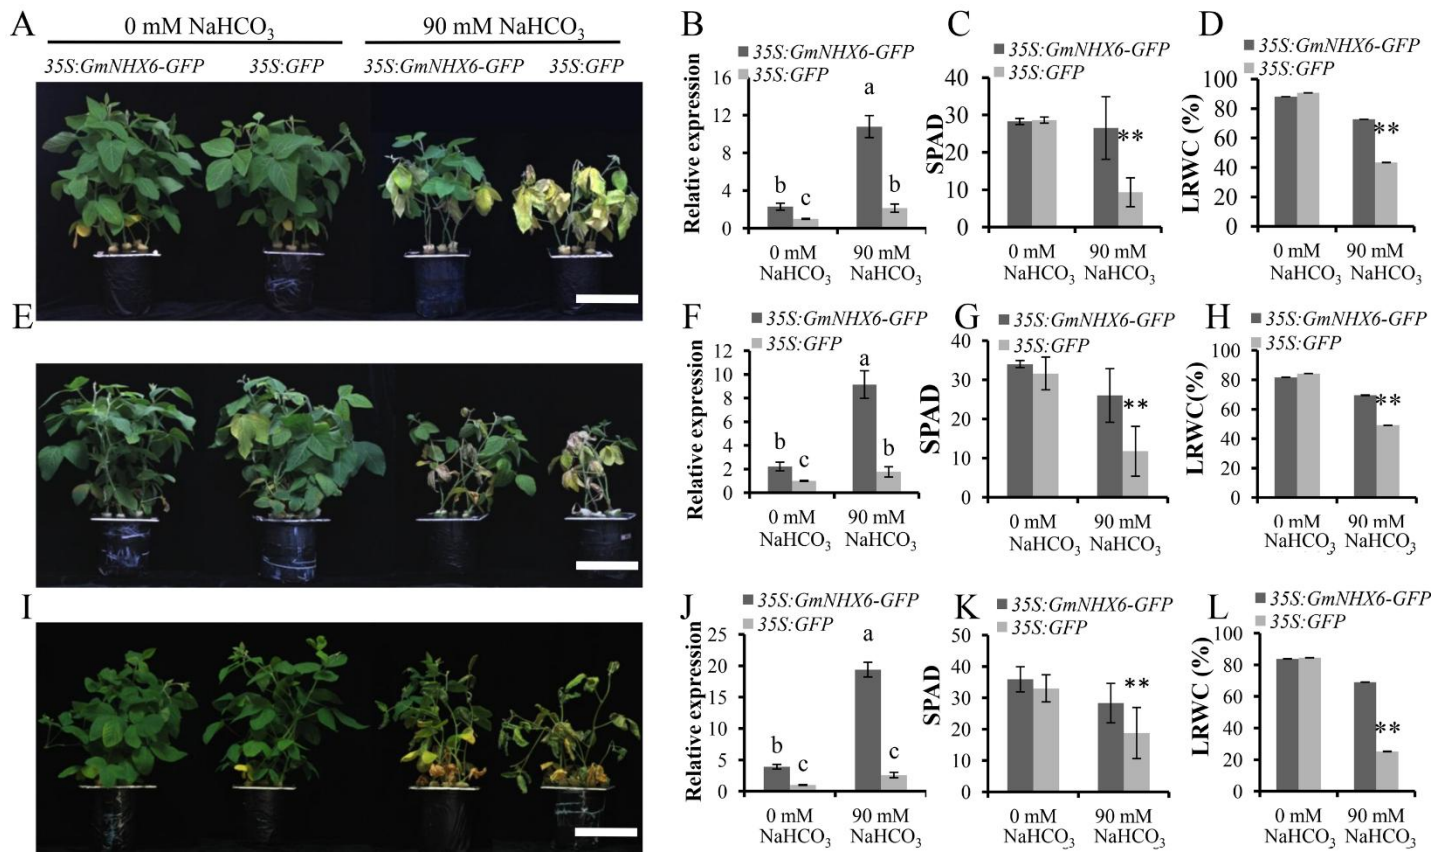

**Supplementary Figure 5. Three biological replications for salt tolerance analyses of transgenic soybean composite plants.** The phenotypes (**A**, **E**, **I**), relative expression (**B**, **F**, **J**), SPAD values for chlorophyll content (**C**, **G**, **K**) and leaf relative water content (**D**, **H**, **L**) of transgenic soybean composite plants under control (0 mM NaHCO<sub>3</sub>) or alkali stress (90 mM NaHCO<sub>3</sub>) were recorded 7 d after treatment. Bar, 12 cm. Soybean variety of “TianLong1” was used. Data represents the mean  $\pm$  standard deviation of technical repeats and each repeat has at least five independent plants for each genotype ( $n = 5$ ). Same letters above bars indicate no significant differences according to Duncan’s multiple range test at 0.05 level. \*\* $P < 0.01$  by two-tailed Student’s  $t$  tests.

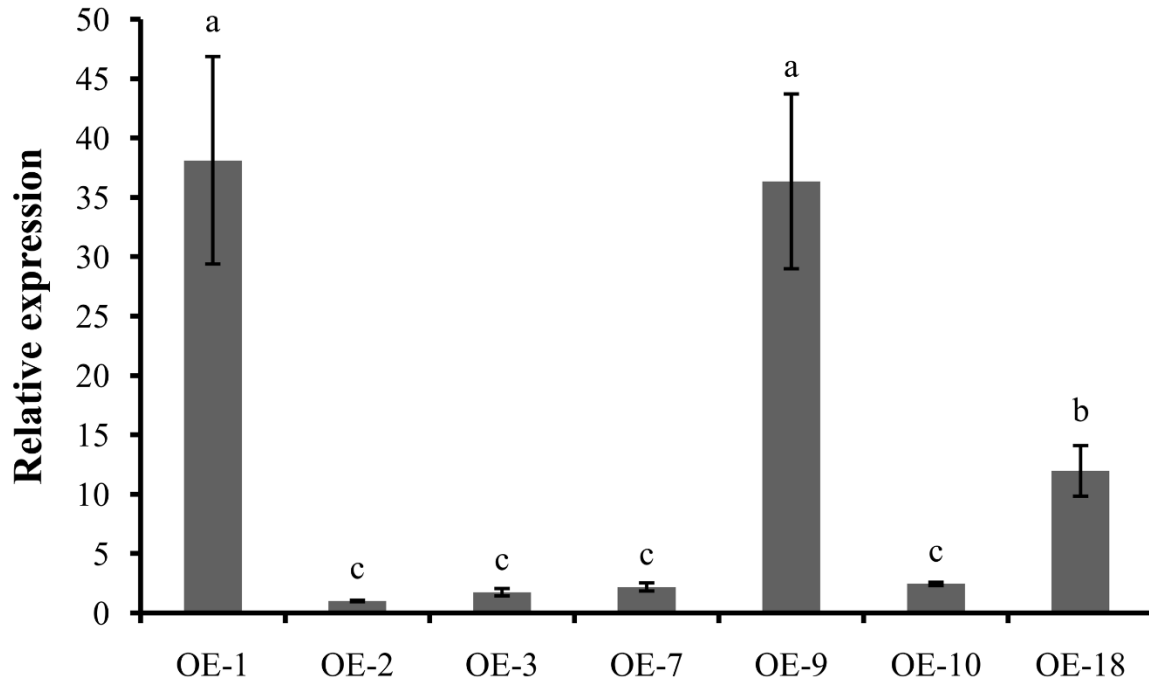

**Supplementary Figure 6. The relative expression level of *GmNHX6* in transgenic *Arabidopsis* lines.** The relative expression of *GmNHX6* in transgenic *Arabidopsis* lines was quantified by qRT-PCR, using *AtACTIN7* as the reference gene and OE-2 line (with lowest expression level of *GmNHX6*) as the control (relative expression = 1). Data represents the mean  $\pm$  standard deviation of three replicates.

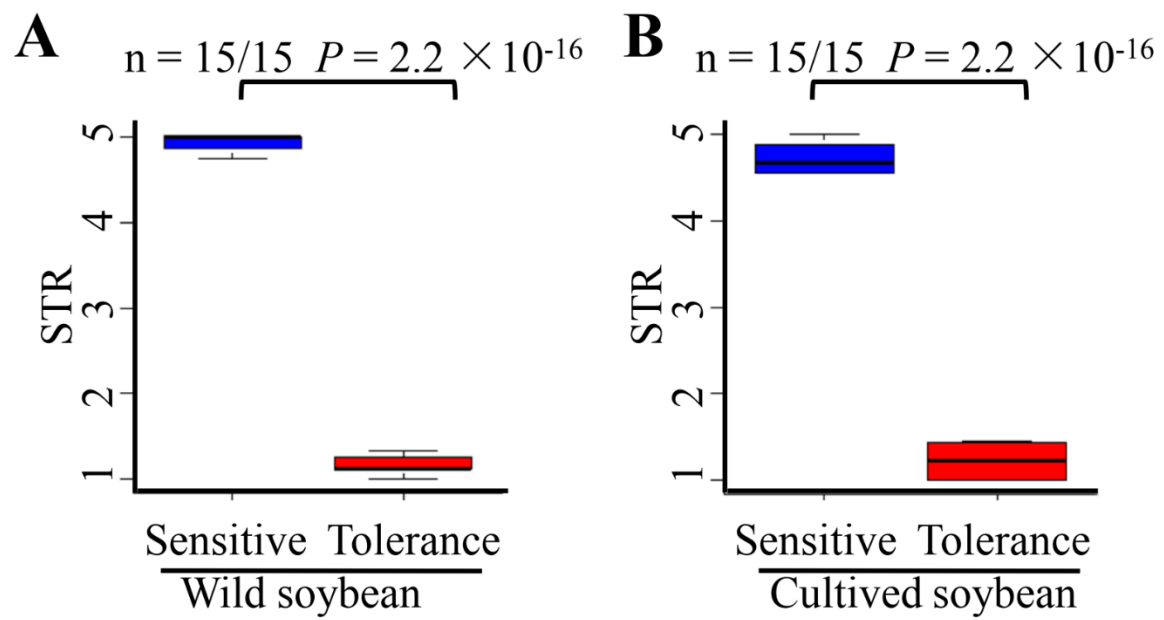

**Supplementary Figure 7. Boxplots of alkaline salt tolerance in 30 wild soybean accessions and 30 cultivated soybean accessions. STR: Sodic (alkaline salt) Tolerance Rating.**



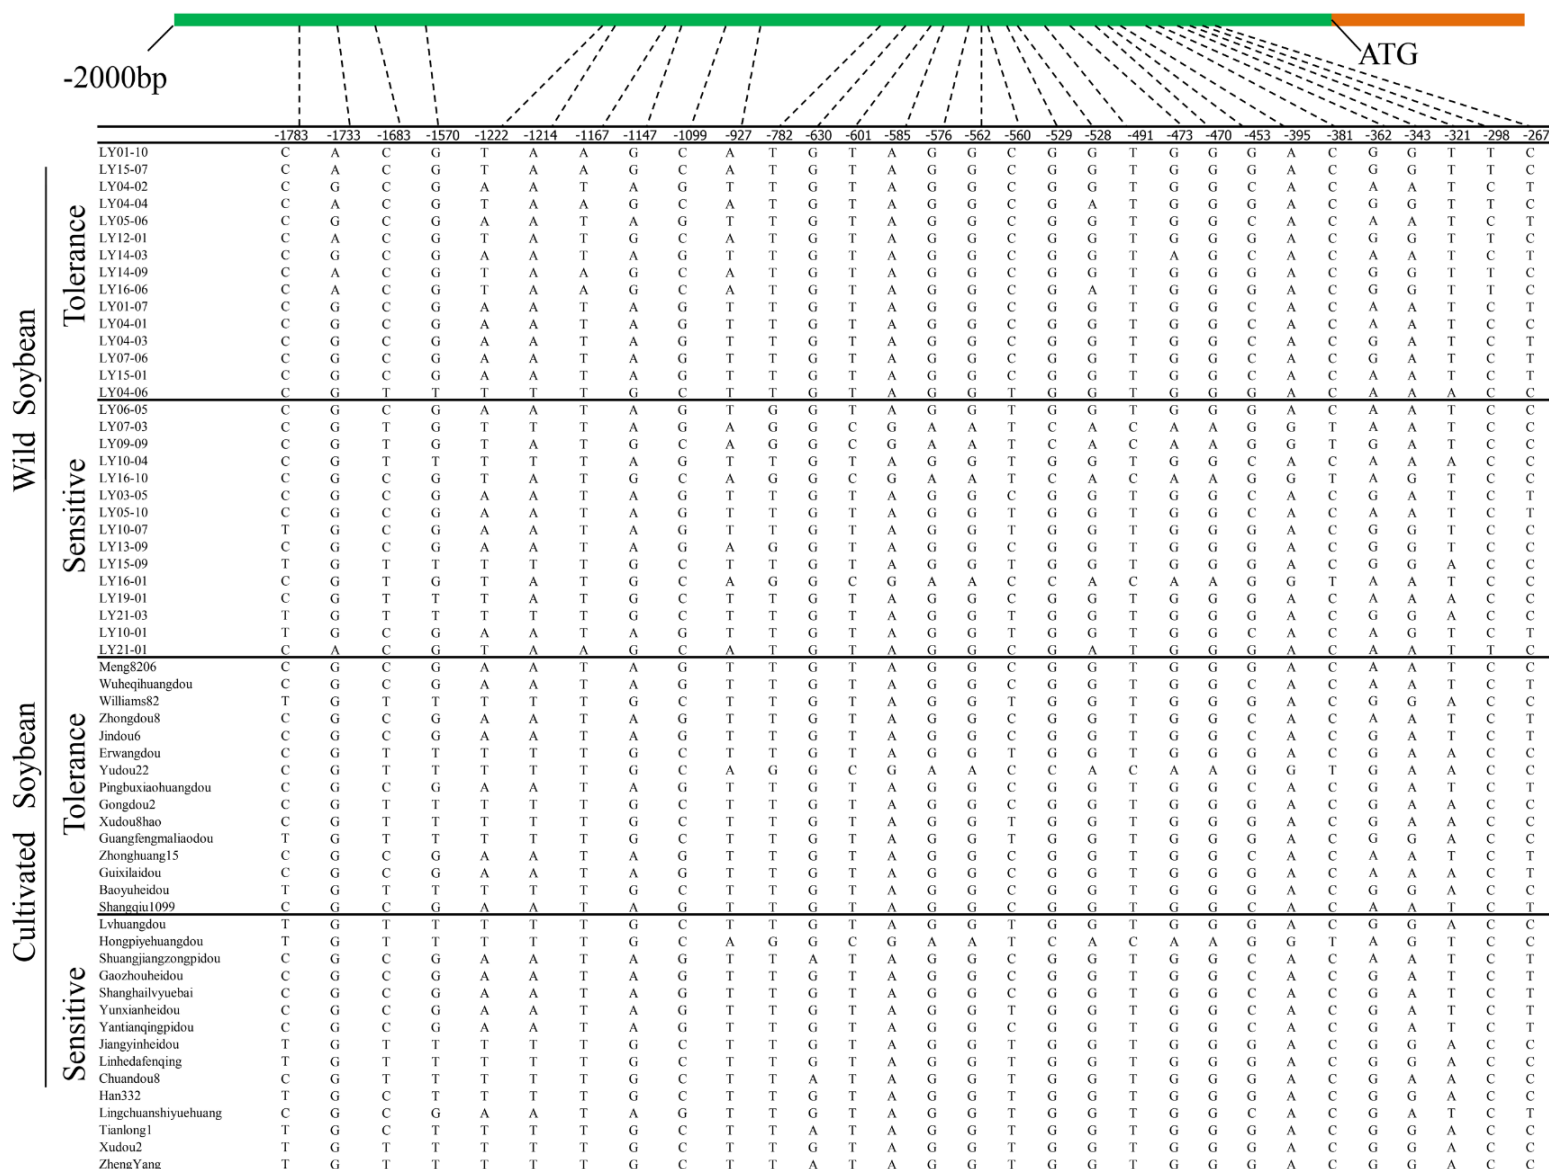

**Supplementary Figure 8. Schematic graph shows the positions and polymorphisms of SNPs in the 2-kb promoter region of soybean *NHX6* gene.**



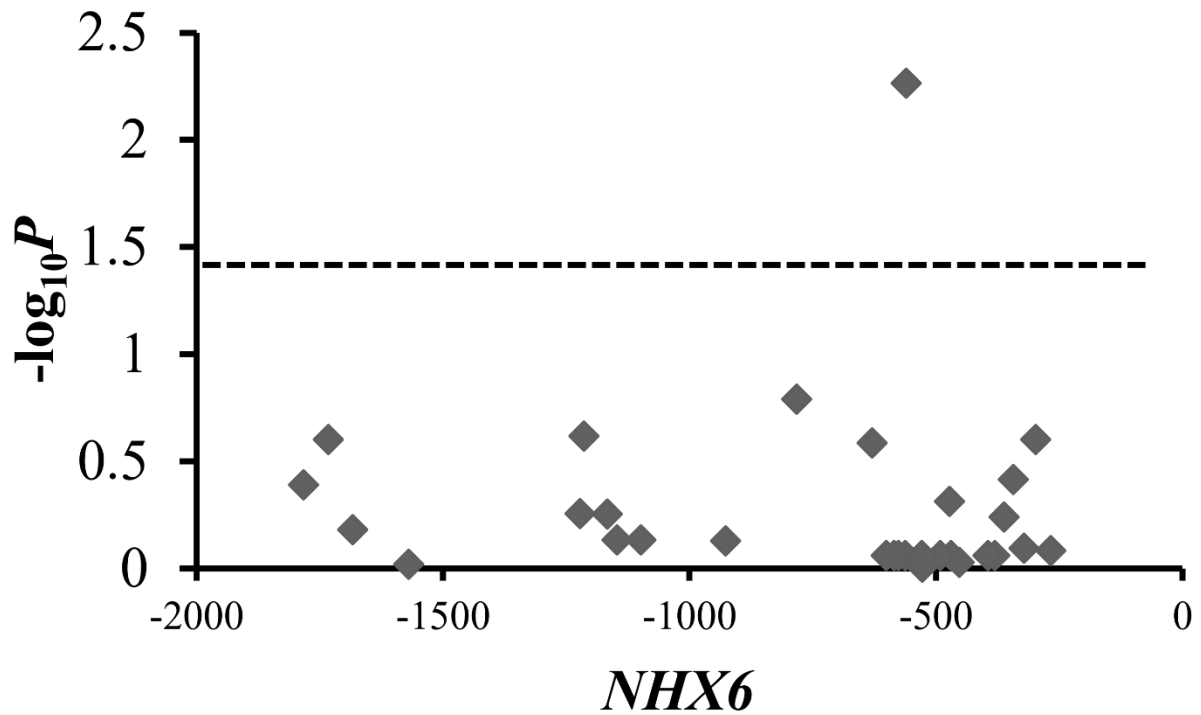

**Supplementary Figure 9. Association of sodic tolerance rating (STR) with the SNPs in soybean *NHX6* promoter region.** The x-axis represents the physical position of each SNP in base pairs (bp) upstream of the start codon of *GmNHX6* gene. The black dotted line represents the significance threshold of significant associations by mixed model, which is  $-\log_{10}(1/30) = 1.48$ .

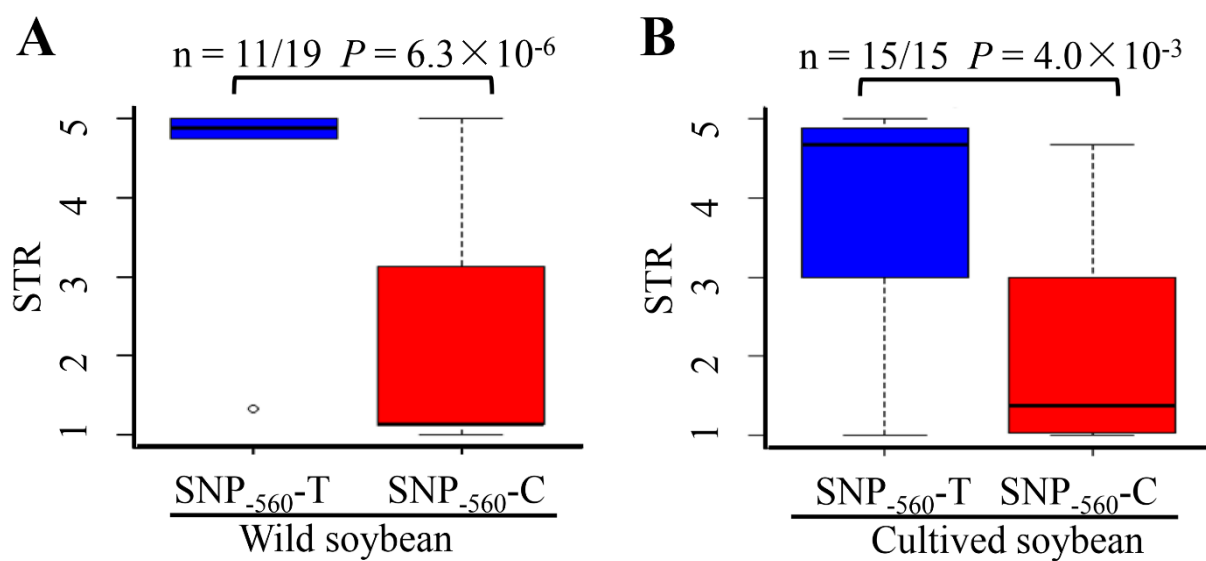

**Supplementary Figure 10. Boxplots of sodic tolerance rating (STR) for the two alleles of SNP<sub>560</sub> in wild (A) and cultivated (B) soybean accessions.**

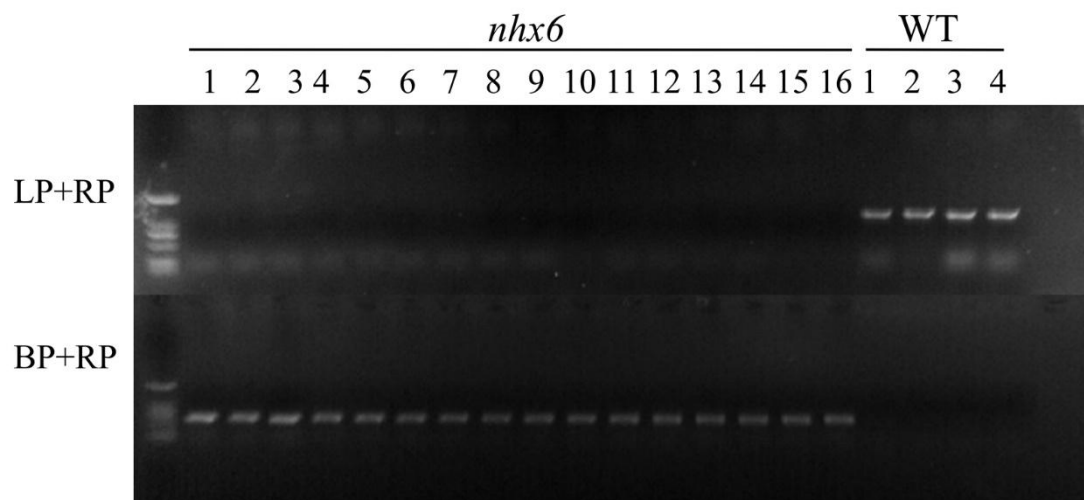

**Supplementary Figure 11. Verification of homozygous *nhx6* mutant lines by the method of three primers.** LB: Left border primer of the T-DNA insertion, TCAAACAGGATTTTCGCCTGCT, RP: Right genomic primer, TTCCGTCAACAAACATTAGCC, LP: Left genomic primer, TCCTCGGAAAGGAAGAAGAAG.

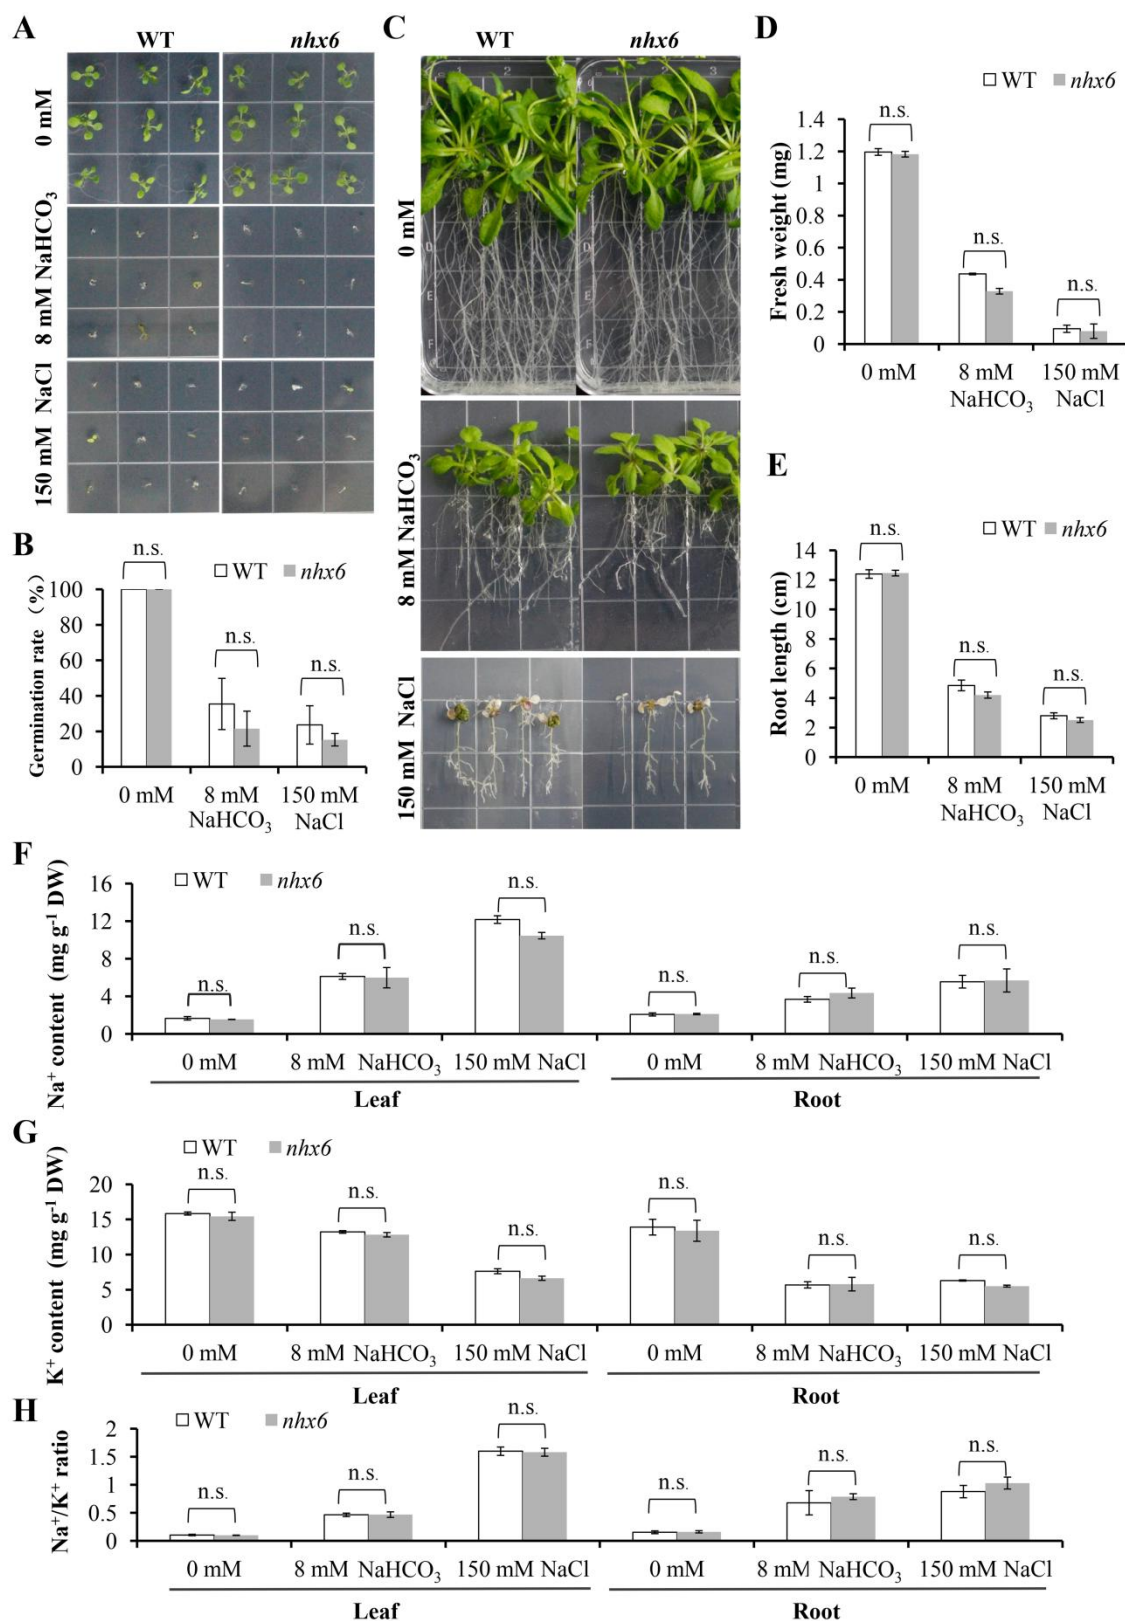

**Supplementary Figure 12. Phenotypes of *Arabidopsis nhx6* mutant and wild type in response to NaHCO<sub>3</sub> and NaCl treatment. (A)** Seed germination assay of different *Arabidopsis* lines on 1/2 MS

medium or media supplied with 8 mM NaHCO<sub>3</sub> or 150 mM NaCl, respectively. WT: wild type. **(B)** Seed germination rates of different *Arabidopsis* lines. **(C)** Phenotypes of *Arabidopsis* lines on 1/2 MS medium or media with 8 mM NaHCO<sub>3</sub> or 150 mM NaCl, respectively. **(D, E)** Fresh weight and root length of *Arabidopsis* lines. **(F)** Na<sup>+</sup> content, **(G)** K<sup>+</sup> content, **(H)** Na<sup>+</sup>/K<sup>+</sup> ratio in the leaves and roots of each line receiving different treatments for 10 days, respectively. Data represents the mean ± standard deviation of three biological replications and each repeat contained four independent plants per line for each treatment ( $n = 12$ ). n.s.: no significant difference by two-tailed Student's *t* tests.

dOCT

-2000(M) TTCTACTCTGCACTGTAAGCCGGTGAAGTGCAGTAATTGTGGTAAGCTTTAGTTTTATCTCTCGGATCTTATACATAAAGTTCCTGCATTACCAAGGGA  
 -2000(ZY) TTCTACTCTGCACTGTAAGCCGGTGAAGTGCAGTAATTGTGGTAAGCTTTAGTTTTATCTCTCGGATCTTATACATAAAGTTCCTGCATTACCAAGGGA

-1900(M) ATGTGCAGATAAAACGCATACAACGCAACACAAGGTTCAAAACGTTGAAGAAGGAAAATAAACAGTATAAACTACTTCACCCACGCACATACCTCGACG  
 -1900(ZY) ATGTGCAGATAAAACGCATACAACGCAACACAAGGTTCAAAACGTTGAAGAAGGAAAATAAACAGTATAAACTACTTCACCCACGCACATACCTCGACG

ABRE TGACG-motif ARE

-1800(M) GCACGCTGGCAGCAGCGAGATCCTCTCGCCTTAGTTCCTGAGTGTCTGGAATCAGAGAATCGGAGCCATCAGAGAGCGAAATTGACGGAACAAA  
 -1800(ZY) GCACGCTGGCAGCAGCGAGATCCTCTCGCCTTAGTTCCTGAGTGTCTGGAATCAGAGAATCGGAGCCATCAGAGAGCGAAATTGACGGAACAAA

-1700(M) CCAAATCAATGAAATCACTGGACGCTAATTGAAGAGATATTAAACCTGTGGCGAACGGCGGCGAGAATCCGGCATCGACGGTGCGAATCTCGTTCTG  
 -1700(ZY) CCAAATCAATGAAATCACTGGACGCTAATTGAAGAGATATTAAACCTGTGGCGAACGGCGGCGAGAATCCGGCATCGACGGTGCGAATCTCGTTCTG

MYB

-1600(M) GATTTTCTGCATCAGCGGCTCCACGCGGAGAGAGACGCTCTGCGTAAACAACGGCAAAATTTGAGAGAAGTTAAGGTTTCGATTAGAAAACGTTGCGAT  
 -1600(ZY) GATTTTCTGCATCAGCGGCTCCACGCGGATAGAGACGCTCTGCGTAAACAACGGCAAAATTTGAGAGAAGTTAAGGTTTCGATTAGAAAACGTTGCGAT

MYB recognition site

-1500(M) TGCGAGTGAGATCGGGAATTTGGCGTACCGTTGGGAACATCTGGTTGATGTACTCCAGAGCGCTTGACTTGTCCATTGGTGAGAATGAACGCAATCAC  
 -1500(ZY) TGCGAGTGAGATCGGGAATTTGGCGTACCGTTGGGAACATCTGGTTGATGTACTCCAGAGCGCTTGACTTGTCCATTGGTGAGAATGAACGCAATCAC

-1400(M) AAAAGCATGAACCGTGATGGTGATTGTGATTAAATGTTTCAGATCTCTAACTTGGCTGTTCCGCCACCATTTATGCTCTCAATTTGTCGGGATCCAATTTG  
 -1400(ZY) AAAAGCATGAACCGTGATGGTGATTGTGATTAAATGTTTCAGATCTCTAACTTGGCTGTTCCGCCACCATTTATGCTCTCAATTTGTCGGGATCCAATTTG

TGACG-motif

-1300(M) CAGATGTGTGTGCTGTGACTGTGACGCTATTGTTAGTGTCTCTCTTTTCGTCGCTTCAACCTCTGGACACTTCTGTAATATTTTATATATATACTA  
 -1300(ZY) CAGATGTGTGTGCTGTGACTGTGACGCTATTGTTAGTGTCTCTCTTTTCGTCGCTTCAACCTCTGGACACTTCTGTTATATTTTATATATATACTA

ABRE ERE

-1200(M) CTATTTTATATATGGATGAAAACATAAATATGTTTTTACTGAAAAACACGTAAGTATGAATTCATTTCTGTAACCTTTTATTTTAAATATATATCTA  
 -1200(ZY) CTATTTTATATATGGATGAAAACATAAATATGTTTTTACTGAAAAACACGTAAGTATGAATTCATTTCTGTAACCTTTTATTTTAAATATATCTA

W box

-1100(M) GGTTCGATTGATTCTCATGTCAATGTATGATTCTATTCTTATGTGTCACCTCTGTGACCAAAATCTTGACTACTCTCTTTTCTCATAATCAAAAC  
 -1100(ZY) GCTTCGATTGATTCTCATGTCAATGTATGATTCTATTCTTATGTGTCACCTCTGTGACCAAAATCTTGACTACTCTCTTTTCTCATAATCAAAAC

-1000(M) TTCCCAAACCTTGAAAAAAGAAAGGCTCAAAATTTGCAAAATGATTAAATGCTCTTCATCATAAAATTTGACATATAGTAACAAAAAGAAAGGCTTTG  
 -1000(ZY) TTCCCAAACCTTGAAAAAAGAAAGGCTCAAAATTTGCAAAATGATTAAATGCTCTTCATCATAAAATTTGACATATAGTAACAAAAAGAAAGGCTTTG

Box 4 ERE

-900(M) GGGTAGTTTTATAGTTGACTTTTTATTACGCTAAATTAATAATTTAAATTTTCTTATTATGTAATTATTATATTAATTTAGTTTGGTTTT  
 -900(ZY) GGGTAGTTTTATAGTTGACTTTTTATTACGCTAAATTAATAATTTAAATTTTCTTATTATGTAATTATTATATTAATTTAGTTTGGTTTT

MYC

-800(M) TAAAAACATGTTTCATATTAATTTTTCTTTATTCCTTTACGTATTATGACAATATGTTAAGTTGAAAATTAATAAGGTGAACATGTGTTCTCTATAC  
 -800(ZY) TAAAAACATGTTTCATATTAATTTTTCTTTATTCCTTTACGTATTATGACAATATGTTAAGTTGAAAATTAATAAGGTGAACATGTGTTCTCTATAC

MYB AT1-motif WUN-motif

-700(M) ATATATTACATAAAGGAAGACCTTCATCTCTCATCTCAAAAATAGCTTCAACCATATTAATAATGTTGGAAAAAATAAATAGTCAAATTACTAT  
 -700(ZY) ATATATTACATAAAGGAAGACCTTCATCTCTCATCTCAAAAATAGCTTCAACCATATTAATAATGTTGGAAAAAATAAATAGTCAAATTACTAT

TGTCAT element Skn-1 motif TCATTT element TTGTCA element

-600(M) TTCTTTTTATAATAACATTTATGTAATTGACAATGTTGTTATTTATGACATTTATTTATCAAAATATATGGATATAACTTTGATCAATTATTACATTG  
 -600(ZY) TTCTTTTTATAATAACATTTATGTAATTGACAATGTTGTTATTTATGACATTTATTTATCAAAATATATGGATATAACTTTGATCAATTATTACATTG

Box 4 GA-motif TC-rich repeats TATA

-500(M) TTGATAAACTTTCAATTAGATAAATATGATGATTAAATTAATGATTCAATAGATAAAAAATTATTTCTATAACAATTTATAAAATAGTATAATTGTTT  
 -500(ZY) TTGATAAACTTTCAATTAGATAAATATGATGATTAAATTAATGATTCAATAGATAAAAAATTATTTCTATAACAATTTATAAAATAGTATAATTGTTT

Box 4 ABRE Box 4 Box 4

-400(M) AAGAAATATAATTCAAATTCATTAAATATCTTATTCACATAGATTAATAATCAATCAATATAAATGTTTAAATATATATAATATGAATATTGTTGATT  
 -400(ZY) AAGAAATATAATTCAAATTCATTAAATATCTTATTCACATAGATTAATAATCAATCAATATAAATGTTTAAATATATAAATATGAATATTGTTGATT

AT-rich element

-300(M) ATCTATTTGTAGTTTAATTTTAAATAAATTTGATATAAAGCATCTTAATAATTTATAAATATAATTTAAGGTGGATTAATAAAATCAAAATTTTATAATA  
 -300(ZY) ATCTATTTGTAGTTTAATTTTAAATAAATTTGACATAAATGATCTTAATAATTTATAAATATAATTTAAGGTGGATTAATAAAATCAAAATTTTATAATA

Box 4 Box 4 ARE ATCT-motif

-200(M) TTAATAATTTAATATCCGGAGTCCAAGAGGTGAGAAGAACAGAGAAACAGAATTGAAAACTCACAAACAGATAGAGAGAAATCAATCAAGAACAGAG  
 -200(ZY) TTAATAATTTAATATCCGGAGTCCAAGAGGTGAGAAGAACAGAGAAACAGAATTGAAAACTCACAAACAGATAGAGAGAAATCAATCAAGAACAGAG

GCN4 motif

-100(M) TTCTGTTCTTTTCTCTGATTCGGAAGAACTCAACGATCCAATCGCAACCGGAAGCAATCGATCAGTGAGTCAATTGCTTCCGGCAAGGAGAACAATA  
 -100(ZY) TTCTGTTCTTTTCTCTGATTCGGAAGAACTCAACGATCCAATCGCAACCGGAAGCAATCGATCAGTGAGTCAATTGCTTCCGGCAAGGAGAACAATA



**Supplementary Figure 13. The *cis*-element analysis of the 2-kb promoter region upstream of start codon ATG of *GmNHX6* from soybean varieties of M8206 (M) and ZY.**

**Supplementary Table 1. List of 60 soybean accessions with extreme alkaline salt tolerance (sodic tolerance rating, STR).**

| Accession      | Category           | Average STR | Alkaline salt tolerance |
|----------------|--------------------|-------------|-------------------------|
| LY01-10        | Wild soybean       | 1.00        | Tolerant                |
| LY15-07        | Wild soybean       | 1.00        | Tolerant                |
| LY04-02        | Wild soybean       | 1.13        | Tolerant                |
| LY04-04        | Wild soybean       | 1.13        | Tolerant                |
| LY05-06        | Wild soybean       | 1.13        | Tolerant                |
| LY12-01        | Wild soybean       | 1.13        | Tolerant                |
| LY14-03        | Wild soybean       | 1.13        | Tolerant                |
| LY14-09        | Wild soybean       | 1.13        | Tolerant                |
| LY16-06        | Wild soybean       | 1.13        | Tolerant                |
| LY01-07        | Wild soybean       | 1.13        | Tolerant                |
| LY04-01        | Wild soybean       | 1.25        | Tolerant                |
| LY04-03        | Wild soybean       | 1.25        | Tolerant                |
| LY07-06        | Wild soybean       | 1.25        | Tolerant                |
| LY15-01        | Wild soybean       | 1.25        | Tolerant                |
| LY04-06        | Wild soybean       | 1.33        | Tolerant                |
| LY06-05        | Wild soybean       | 4.75        | Sensitive               |
| LY07-03        | Wild soybean       | 4.75        | Sensitive               |
| LY09-09        | Wild soybean       | 4.75        | Sensitive               |
| LY10-04        | Wild soybean       | 4.88        | Sensitive               |
| LY16-10        | Wild soybean       | 4.88        | Sensitive               |
| LY03-05        | Wild soybean       | 5.00        | Sensitive               |
| LY05-10        | Wild soybean       | 5.00        | Sensitive               |
| LY10-07        | Wild soybean       | 5.00        | Sensitive               |
| LY13-09        | Wild soybean       | 5.00        | Sensitive               |
| LY15-09        | Wild soybean       | 5.00        | Sensitive               |
| LY16-01        | Wild soybean       | 5.00        | Sensitive               |
| LY19-01        | Wild soybean       | 5.00        | Sensitive               |
| LY21-03        | Wild soybean       | 5.00        | Sensitive               |
| LY10-01        | Wild soybean       | 5.00        | Sensitive               |
| LY21-01        | Wild soybean       | 5.00        | Sensitive               |
| Meng8206       | Cultivated soybean | 1.00        | Tolerant                |
| Wuheqihuangdou | Cultivated soybean | 1.00        | Tolerant                |
| Williams82     | Cultivated soybean | 1.00        | Tolerant                |
| Zhongdou8      | Cultivated soybean | 1.00        | Tolerant                |

| <b>Accession</b>     | <b>Category</b>    | <b>Average STR</b> | <b>Alkaline salt tolerance</b> |
|----------------------|--------------------|--------------------|--------------------------------|
| Jindou6              | Cultivated soybean | 1.00               | Tolerant                       |
| Erwangdou            | Cultivated soybean | 1.00               | Tolerant                       |
| Yudou22              | Cultivated soybean | 1.05               | Tolerant                       |
| Pingbuxiaohuangdou   | Cultivated soybean | 1.20               | Tolerant                       |
| Gongdou2             | Cultivated soybean | 1.16               | Tolerant                       |
| Xudou8               | Cultivated soybean | 1.44               | Tolerant                       |
| Guangfengmaliaodou   | Cultivated soybean | 1.33               | Tolerant                       |
| Zhuanghuang15        | Cultivated soybean | 1.37               | Tolerant                       |
| Guixilaidou          | Cultivated soybean | 1.44               | Tolerant                       |
| Baoyuheidou          | Cultivated soybean | 1.44               | Tolerant                       |
| Shangqiu1099         | Cultivated soybean | 1.44               | Tolerant                       |
| Lvhuangdou           | Cultivated soybean | 4.55               | Sensitive                      |
| Hongpiyehuangdou     | Cultivated soybean | 4.56               | Sensitive                      |
| Shuangjiangzongpidou | Cultivated soybean | 4.56               | Sensitive                      |
| Gaozhouheidou        | Cultivated soybean | 4.56               | Sensitive                      |
| Shanghailvyuebai     | Cultivated soybean | 4.56               | Sensitive                      |
| Yunxianheidou        | Cultivated soybean | 4.56               | Sensitive                      |
| Yantianqingpidou     | Cultivated soybean | 4.67               | Sensitive                      |
| Jiangyinheidou       | Cultivated soybean | 4.67               | Sensitive                      |
| Linhedafenqing       | Cultivated soybean | 4.70               | Sensitive                      |
| Chuandou8            | Cultivated soybean | 4.78               | Sensitive                      |
| Han332               | Cultivated soybean | 4.89               | Sensitive                      |
| Lingchuanshiyuehuang | Cultivated soybean | 4.89               | Sensitive                      |
| Tianlong1            | Cultivated soybean | 5.00               | Sensitive                      |
| Xudou2               | Cultivated soybean | 5.00               | Sensitive                      |
| ZhengYang            | Cultivated soybean | 5.00               | Sensitive                      |

**Supplementary Table 2. Primers used for qRT-PCR, gene cloning, and vector construction.**

| Primer sets                    | Forward primer sequences                        | Reverse primer sequences                        | Purpose             | Amplification Efficiency (Mean±SD) |
|--------------------------------|-------------------------------------------------|-------------------------------------------------|---------------------|------------------------------------|
| q- <i>GmNHX6</i>               | TGCTGCCTCTTTTACTGCATTAGAT                       | ACCATGAAGTTCCGATCTTGTAGAA                       | qRT-PCR             | 1.01±0.01                          |
| <i>GmUKN1</i>                  | TGGTGCTGCCGCTATTTACTG                           | GGTGGAAGGAACTGCTAACAATC                         | qRT-PCR             | 0.99±0.02                          |
| <i>AtACTIN7</i>                | CCTCAGCACCTTCCAACAGATG                          | AACTCACCACCACGAACCAGAT                          | qRT-PCR             | 1.02±0.01                          |
| c- <i>GmNHX6</i>               | GTGAGTCAATTGCTTCCGGC                            | GCACAAGTAATGCGCACCAA                            | Gene cloning        |                                    |
| c- <i>GmNHX6</i> -promoter     | CTTCACCCACGCACATACCT                            | GAGGACGAAGGACAAGACCAG                           | Promoter cloning    |                                    |
| v-pBinGFP4- <i>GmNHX6</i>      | TCCCCCGGGATGAC<br>CTCGGAGTTAGAAAT               | CGCGGATCCTGATGAA<br>TAGTGGTTCTGACC              | Vector construction |                                    |
| v-pCAMBIA3301- <i>GmNHX6</i>   | tctagaggatctcgaggcgcgcc<br>ATGACCTCGGAGTTAGAAAT | attcgagctcactagtaattaa<br>TGATGAATAGTGGTTCTGACC | Vector construction |                                    |
| v-pAN580- <i>GmNHX6</i>        | CTAGCTAGCATGACC<br>TCGGAGTTAGAAATTTCTC          | CCCCCGGGTGATGA<br>ATAGTGGTTCTGAC                | Vector construction |                                    |
| c- <i>GmNHX6</i> -promoter-LUC | ctatagggcgaattgggtacc<br>CTTCACCCACGCACATACCTC  | atcgataccgtcgacctcgag<br>TATTGTTCTCCTTGCCGGAAGC | Vector construction |                                    |

**Supplementary Table 3. The summary of the Ct values of the reference gene GmUKN1 for qRT-PCR across all samples in this study.**

| <b>Minimum</b> | <b>Maximum</b> | <b>Mean</b> | <b>Standard Deviation</b> |
|----------------|----------------|-------------|---------------------------|
| 19.99          | 20.99          | 20.53       | 0.25                      |

Note: A total of 540 Ct values from 60 samples  $\times$  3 biological replications  $\times$  3 technical repeats.

**Supplementary Table 4. Regional association study of the alkaline salt tolerance.**

| SNP (Chr_bp) | Position <sup>a</sup> | Allele (major: minor) | MAF <sup>b</sup> (%) | P-value (MLM <sup>c</sup> ) |
|--------------|-----------------------|-----------------------|----------------------|-----------------------------|
| 9_1430060    | -267                  | T:C                   | 38.33%               | 0.7210                      |
| 9_1430091    | -298                  | C:T                   | 11.67%               | 0.2249                      |
| 9_1430114    | -321                  | T:A                   | 35.00%               | 0.7803                      |
| 9_1430136    | -343                  | A:G                   | 38.33%               | 0.4516                      |
| 9_1430155    | -362                  | A:G                   | 40.00%               | 0.7390                      |
| 9_1430174    | -381                  | C:T                   | 10.00%               | 0.8274                      |
| 9_1430188    | -395                  | A:G                   | 10.00%               | 0.8274                      |
| 9_1430246    | -453                  | C:G                   | 40.00%               | 0.8948                      |
| 9_1430263    | -470                  | G:A                   | 10.00%               | 0.8274                      |
| 9_1430266    | -473                  | G:A                   | 11.67%               | 0.5628                      |
| 9_1430284    | -491                  | T:C                   | 10.00%               | 0.8274                      |
| 9_1430321    | -528                  | G:A                   | 15.00%               | 0.9868                      |
| 9_1430322    | -529                  | G:C                   | 10.00%               | 0.8274                      |
| 9_1430353    | -560                  | C:T                   | 43.33%               | 0.0055                      |
| 9_1430355    | -562                  | G:A                   | 10.00%               | 0.8274                      |
| 9_1430369    | -576                  | G:A                   | 10.00%               | 0.8274                      |
| 9_1430378    | -585                  | A:G                   | 10.00%               | 0.8274                      |
| 9_1430394    | -601                  | T:C                   | 10.00%               | 0.8274                      |
| 9_1430423    | -630                  | G:A                   | 6.67%                | 0.2558                      |
| 9_1430575    | -782                  | T:G                   | 13.33%               | 0.1598                      |
| 9_1430720    | -927                  | T:A                   | 23.33%               | 0.8753                      |
| 9_1430892    | -1099                 | G:C                   | 50.00%               | 0.6015                      |
| 9_1430940    | -1147                 | A:G                   | 50.00%               | 0.6015                      |
| 9_1430960    | -1167                 | T:A                   | 10.00%               | 0.5348                      |
| 9_1431007    | -1214                 | A:T                   | 35.00%               | 0.2001                      |
| 9_1431015    | -1222                 | A:T                   | 46.67%               | 0.5750                      |
| 9_1431363    | -1570                 | G:T                   | 35.00%               | 0.9620                      |
| 9_1431476    | -1683                 | C:T                   | 36.67%               | 0.6813                      |
| 9_1431526    | -1733                 | G:A                   | 11.67%               | 0.2249                      |
| 9_1431576    | -1783                 | C:T                   | 25.00%               | 0.4274                      |

<sup>a</sup>Position: position from the start codon; <sup>b</sup>MAF: minor allele frequency; <sup>c</sup>MLM: Mixed linear model.
